# Supplementary material for: Two NADPH: Protochlorophyllide Oxidoreductase (POR) Isoforms Play Distinct Roles in Environmental Adaptation in Rice
Source: PubMed Central journal article supplement (PMC5226909; doi:10.1186/s12284-016-0141-2), 2017-01-11
Supplement: 12284_2016_141_MOESM3_ESM.pdf [file 12284_2016_141_MOESM3_ESM.pdf]

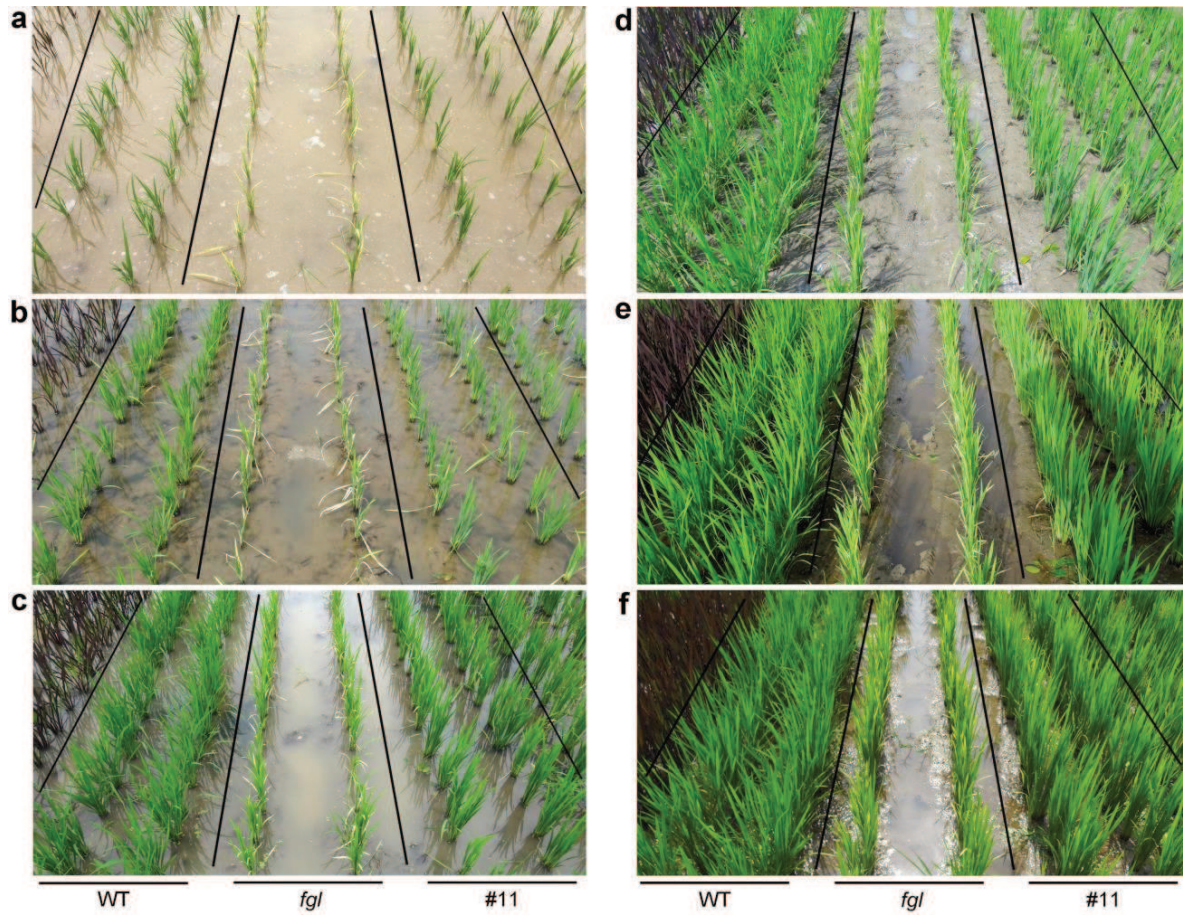

**Additional file 3: Figure S3** Phenotypes of WT, *fgl* mutant, and OPAO homozygous T<sub>2</sub> line #11 in the paddy field.

**a-f** Each panel shows plants at 60 (**a**), 65 (**b**), 70 (**c**), 75 (**d**), 80 (**e**), and 85 days after sowing (**f**).
